# Supplementary material for: Mesoporous polymeric nanoparticles for effective treatment of inflammatory diseases: an in vivo study
Source: Royal Society of Chemistry journal article supplement (doi:10.1039/d4tb02012j), 2025-01-01
Supplement: d4tb02012j1.pdf [file d4tb02012j1.pdf]

## Supplementary Information

### Mesoporous polymeric nanoparticles for effective treatment of inflammatory diseases: an *in vivo* study

Divya Pareek<sup>a</sup>, Md. Zeyauallah<sup>b</sup>, Sukanya Patra<sup>a</sup>, Oviya Algu<sup>a</sup>, Gurmeet Singh<sup>a</sup>, Kirti Wasnik<sup>a</sup>,  
Prem Shankar Gupta<sup>a</sup>, Pradip Paik<sup>a\*</sup>

<sup>a</sup>School of Biomedical Engineering, Indian Institute of Technology, Banaras Hindu University, Varanasi 221 005 INDIA

Department of Zoology, Institute of Science, Banaras Hindu University, Varanasi 221005 INDIA.

\*Corresponding author: paik.bme@iitbhu.ac.in

#### Supporting Figures:

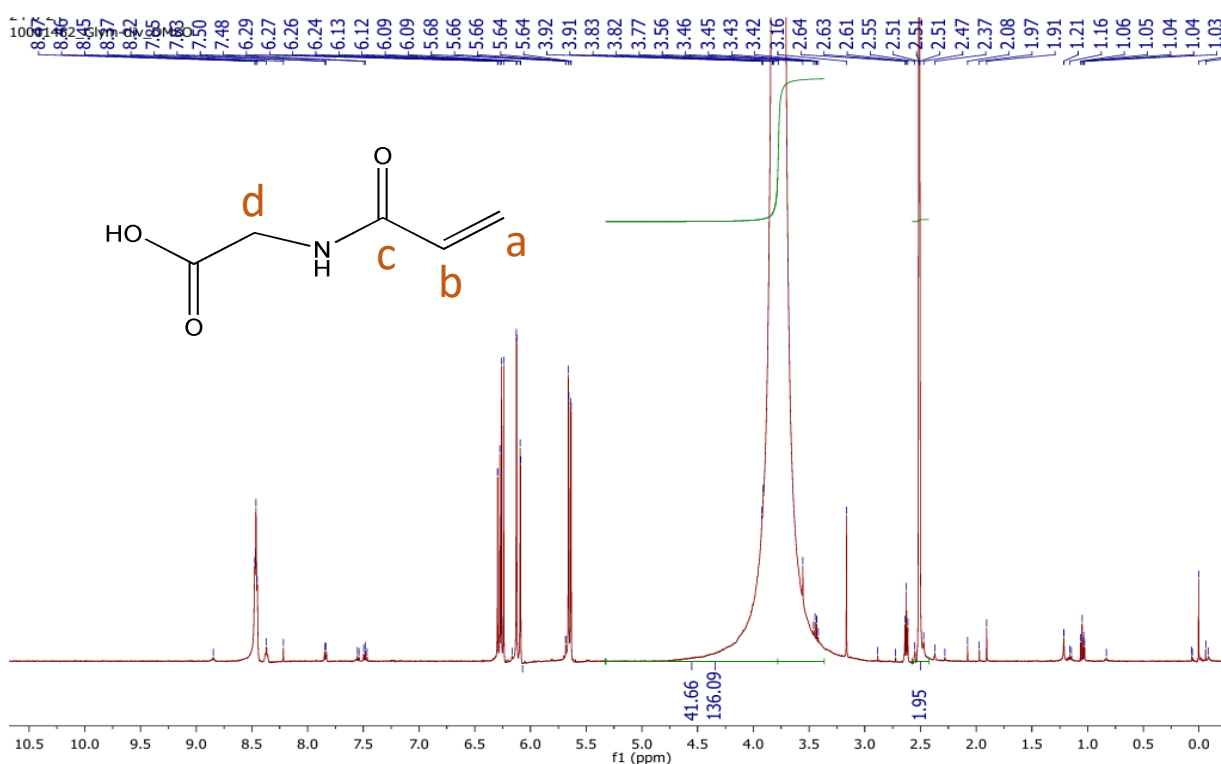

**Figure S1:** <sup>1</sup>H NMR spectroscopy results for monomer synthesized from glycine and N-acryloyl chloride

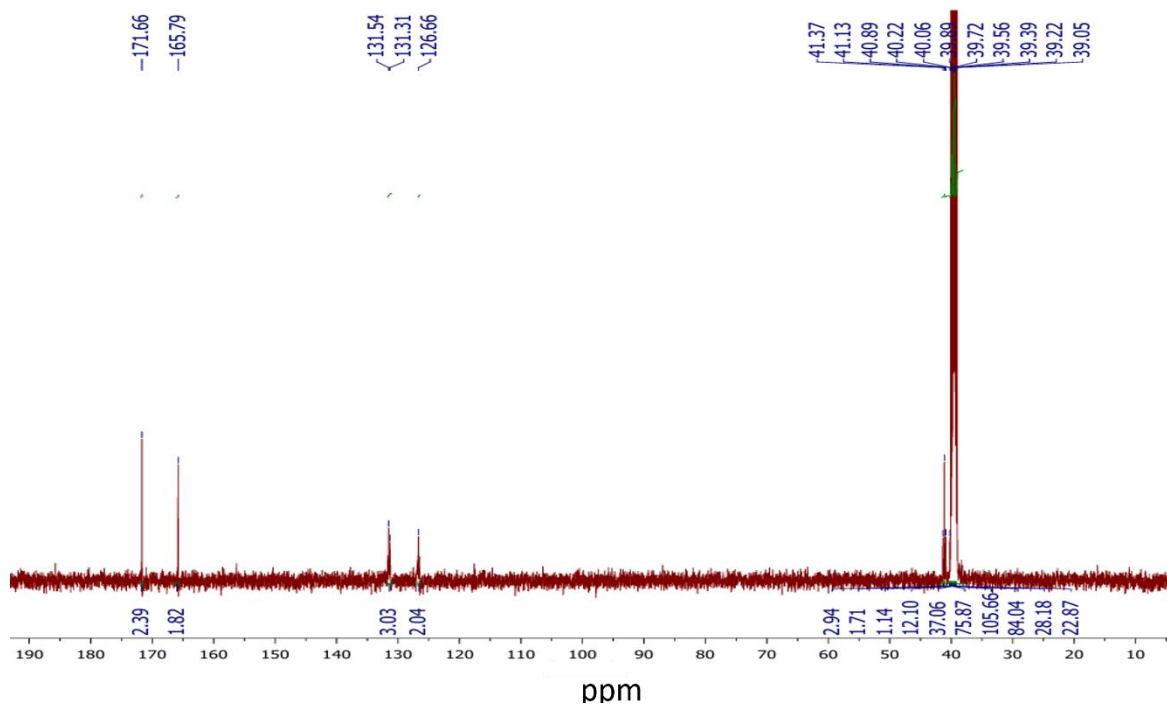

**Figure: S2**  $^{13}\text{C}$  NMR spectroscopy results for monomer synthesized from glycine and N-acryloyl chloride

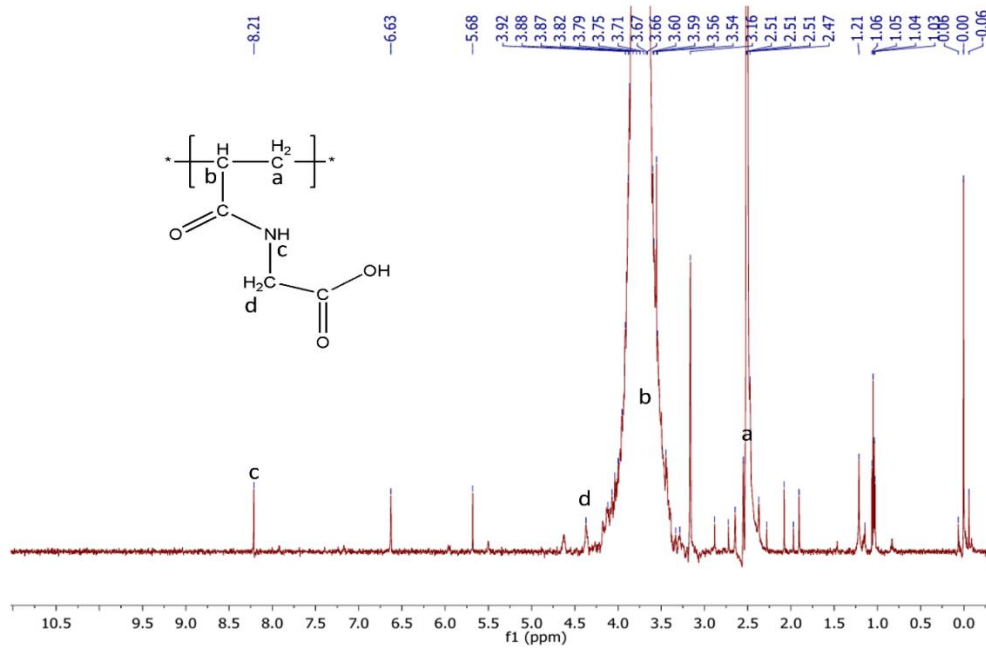

**Figure S3:**  $^1\text{H}$  NMR spectroscopy results for polymer synthesized (GlyNPs)

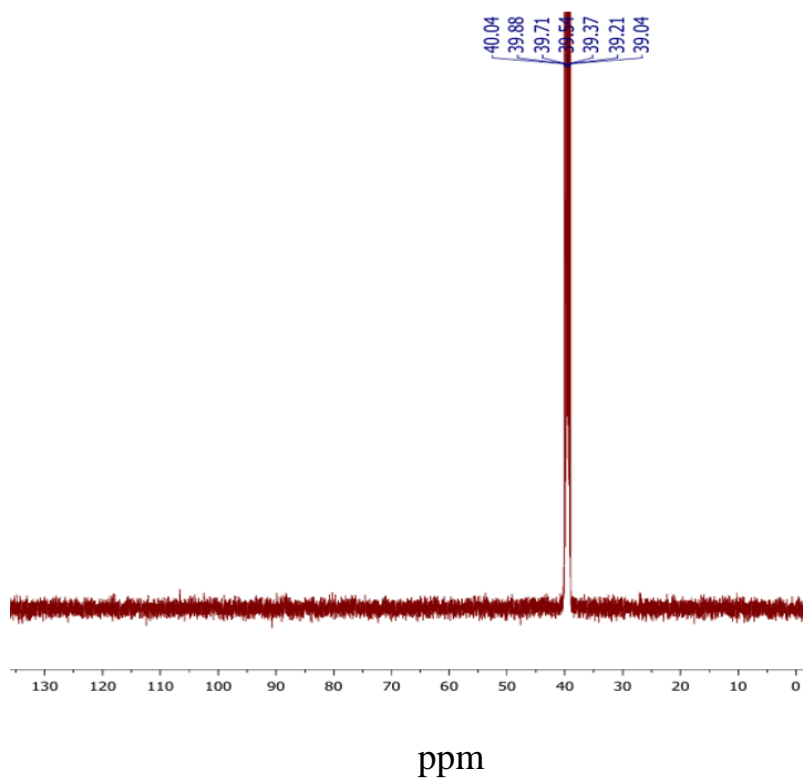

**Figure: S4**  $^{13}\text{C}$ -NMR spectroscopy results for polymer synthesized (GlyNPs)

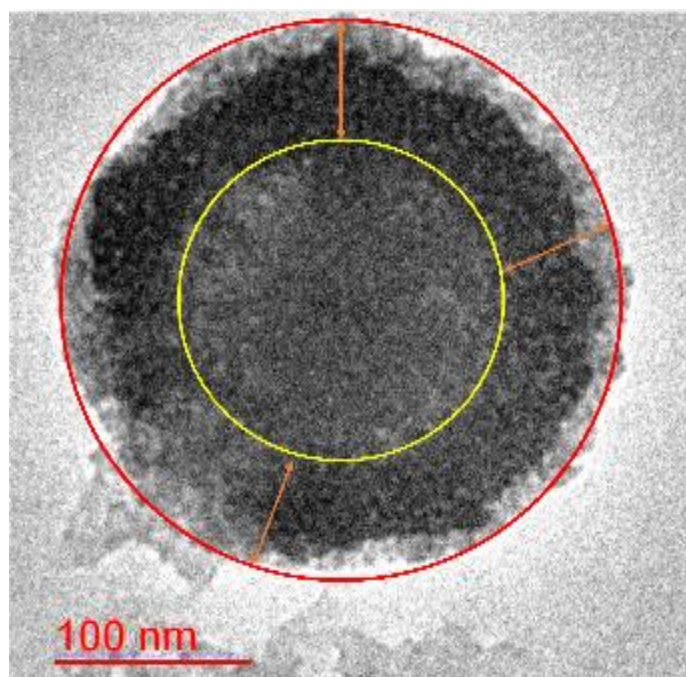

**Figure S5:** HR-TEM image of porous GlyNPs shows the hollow core and solid shell.

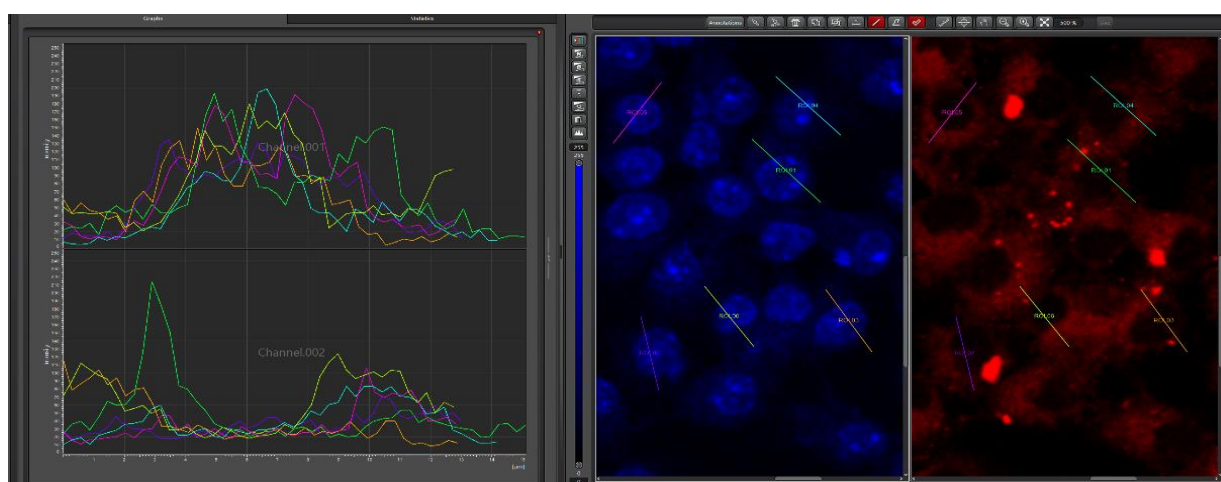

**Figure S6** Represents confocal microscopy images that are showing uptake of the GlyNPs by RAW 264.7 Macrophages. (a) Intensity of the emission of lights from different position of the cells. (b) Blue colour emits from nucleus (DAPI stained). (c) Red emission observed due to the uptake of the Nile Red loaded in GlyNPs. Deep red colour exhibiting the position of the internalized GlyNPs.

## Supporting Table

**Table S1:** Software and web tools used for network pharmacology study and *in silico* docking analysis.

| S/ N | Software/Web tools/<br>Database name | URL                                                                                                             |
|------|--------------------------------------|-----------------------------------------------------------------------------------------------------------------|
| 1.   | Malacard                             | <a href="https://www.malacards.org/">https://www.malacards.org/</a>                                             |
| 2.   | GeneCards database                   | <a href="https://www.genecards.org">https://www.genecards.org</a>                                               |
| 3.   | DisGeNet database                    | <a href="https://www.disgenet.org/search">https://www.disgenet.org/search</a>                                   |
| 4.   | Venny 2.0                            | <a href="https://bioinfogp.cnb.csic.es/tools/venny/">https://bioinfogp.cnb.csic.es/tools/venny/</a>             |
| 5.   | String tool                          | <a href="https://string-db.org/">https://string-db.org/</a>                                                     |
| 6.   | Cytoscape-3.9                        | <a href="https://cytoscape.org/download.html">https://cytoscape.org/download.html</a>                           |
| 7.   | ShinyGo 0.77                         | <a href="http://bioinformatics.sdstate.edu/go/">http://bioinformatics.sdstate.edu/go/</a>                       |
| 8.   | PubChem database                     | <a href="https://pubchem.ncbi.nlm.nih.gov/">https://pubchem.ncbi.nlm.nih.gov/</a>                               |
| 9.   | Auto Dock                            | <a href="https://autodock.scripps.edu/download-autodock4/">https://autodock.scripps.edu/download-autodock4/</a> |

**Table S2:** Shows top 20 targeted genes obtained from network pharmacology study.

| Rank of selected targets | Name of targeted genes | Score    |
|--------------------------|------------------------|----------|
| 1.                       | Ifng                   | 1.09E+36 |
| 2.                       | Il6                    | 1.09E+36 |
| 3.                       | Cd4                    | 1.09E+36 |
| 4.                       | Csf2                   | 1.09E+36 |
| 5.                       | Il10                   | 1.09E+36 |
| 6.                       | Itgad                  | 1.09E+36 |
| 7.                       | Ptpnc                  | 1.09E+36 |
| 8.                       | Il1b                   | 1.09E+36 |
| 9.                       | Cd80                   | 1.09E+36 |
| 10.                      | Cd40                   | 1.09E+36 |
| 11.                      | Ccl3                   | 1.09E+36 |
| 12.                      | Cd86                   | 1.09E+36 |
| 13.                      | Il18                   | 1.09E+36 |
| 14.                      | Tlr2                   | 1.09E+36 |
| 15.                      | Ccl4                   | 1.09E+36 |
| 16.                      | Tlr1                   | 1.09E+36 |
| 17.                      | Cxcl9                  | 1.09E+36 |
| 18.                      | Stat1                  | 1.09E+36 |
| 19.                      | Fcgr2a                 | 1.09E+36 |
| 20.                      | Foxp3                  | 1.09E+36 |

**Table S3.** Docking result of screened ligands for **COX-2** (PDB ID: **6COX**).

| S.No. | Ligands                | Binding Energy (kcal/mol) | Estimated inhibition constant, Ki | Residues involved in Hydrogen Bonding |
|-------|------------------------|---------------------------|-----------------------------------|---------------------------------------|
|       | <b>Reference drugs</b> |                           |                                   |                                       |
| 1.    | Aspirin                | -5.37                     | 116.41 $\mu$ M                    | HIS90                                 |
| 2.    | Diclofenac             | -5.11                     | 178.6 $\mu$ M                     | HIS90, ARG513                         |
|       | <b>Ligands</b>         |                           |                                   |                                       |
| 3.    | N-Acryloyl Glycine     | -5.17                     | 163.66 $\mu$ M                    | ASN87, HIS90, ARG513                  |
| 4.    | G2                     | -4.09                     | 1.0 mM                            | HIS90, TYR91                          |
| 5.    | G3                     | -3.39                     | 3.25 mM                           | ASN87, HIS90, TYR91                   |
| 6.    | G4                     | -3.54                     | 2.54 mM                           | HIS90, TYR91                          |

**Table S4.** Docking result of screened ligands for **NF-k $\beta$**  (PDB ID: **1LE5**).

| S.No. | Ligands                | Binding Energy (kcal/mol) | Estimated inhibition constant, K <sub>i</sub> | Residues involved in Hydrogen Bonding |
|-------|------------------------|---------------------------|-----------------------------------------------|---------------------------------------|
|       | <b>Reference drugs</b> |                           |                                               |                                       |
| 1..   | Aspirin                | -4.58                     | 441.19 $\mu$ M                                | ARG54, LYS241                         |
| 2     | Diclofenac             | -4.81                     | 298.19 $\mu$ M                                | LYS145                                |
|       | <b>Ligands</b>         |                           |                                               |                                       |
| 3.    | N-Acryloyl glycine     | -4.11                     | 972.38 $\mu$ M                                | LYS114, ASN136                        |
| 4.    | G2                     | -5.04                     | 202.86 $\mu$ M                                | LYS145, LYS203                        |
| 5.    | G3                     | -5.67                     | 69.58 $\mu$ M                                 | LYS145, LYS203                        |
| 6.    | G4                     | -4.59                     | 431.23 $\mu$ M                                | LYS144, LYS203                        |

**Table S5.** Docking result of screened ligands for **IL-6** (PDB ID: **1ALU**).

| S.No. | Ligands                | Binding Energy (kcal/mol) | Estimated inhibition constant, $K_i$ | Residues involved in Hydrogen Bonding |
|-------|------------------------|---------------------------|--------------------------------------|---------------------------------------|
|       | <b>Reference drugs</b> |                           |                                      |                                       |
| 1.    | Aspirin                | -5.54                     | 86.32 $\mu$ M                        | LYS27, ARG30                          |
| 2.    | Diclofenac             | -6.74                     | 11.47 $\mu$ M                        | LYS27                                 |
|       | <b>Ligands</b>         |                           |                                      |                                       |
| 3.    | N-Acryloyl Glycine     | -4.88                     | 265.35 $\mu$ M                       | LYS27, ARG30                          |
| 4.    | G2                     | -5.73                     | 62.91 $\mu$ M                        | ASP26, LYS27, ARG30                   |
| 5.    | G3                     | -4.55                     | 461.43 $\mu$ M                       | LYS27, ARG30                          |
| 6.    | G4                     | -4.80                     | 303.11 $\mu$ M                       | SER22, ASP26, ARG182                  |

**Table S6.** Docking result of screened ligands for **IL-1 $\beta$**  (PDB ID: **5I1B**).

| S.No. | Ligands                | Binding Energy (kcal/mol) | Estimated inhibition constant, $K_i$ | Residues involved in Hydrogen bonding |
|-------|------------------------|---------------------------|--------------------------------------|---------------------------------------|
|       | <b>Reference drugs</b> |                           |                                      |                                       |
| 1.    | Aspirin                | -4.62                     | 410.65 $\mu$ M                       | VAL3, LYS93, LYS94                    |
| 2.    | Diclofenac             | -4.95                     | 233.85 $\mu$ M                       | LYS65                                 |
|       | <b>Ligands</b>         |                           |                                      |                                       |
| 3.    | N-Acryloyl Glycine     | -4.53                     | 480.55 $\mu$ M                       | ARG4, PHE46, LYS93                    |
| 4.    | G2                     | -4.04                     | 1.1 mM                               | ARG4, GLY49, LYS93                    |
| 5.    | G3                     | -3.07                     | 5.62 mM                              | VAL3, GLN48, LYS93                    |
| 6.    | G4                     | -2.1                      | 28.9 mM                              | VAL3, GLN48, LYS93, LYS94             |

**Table S7.** Docking result of screened ligands for **TNF- $\alpha$**  (PDB ID: **2AZ5**).

| S.No. | Ligands                | Binding Energy (kcal/mol) | Estimated inhibition constant, $K_i$ | Residues involved in Hydrogen Bonding |
|-------|------------------------|---------------------------|--------------------------------------|---------------------------------------|
|       | <b>Reference drugs</b> |                           |                                      |                                       |
| 1.    | Aspirin                | -5.59                     | 79.74 $\mu$ M                        | VAL74, LYS112                         |
| 2.    | Diclofenac             | -4.89                     | 258.8 $\mu$ M                        | PRO70, LYS112                         |
|       | <b>Ligands</b>         |                           |                                      |                                       |
| 3.    | N-Acryloyl Glycine     | -4.22                     | 801.54 $\mu$ M                       | PRO70, LYS112                         |
| 4.    | G2                     | -4.48                     | 520.83 $\mu$ M                       | LYS112                                |
| 5.    | G3                     | -2.69                     | 10.76 mM                             | CYS69                                 |
| 6.    | G4                     | -3.35                     | 3.49 mM                              | PRO70, ARG103                         |

**Table S8.** Docking result of screened ligands for **iNOS** (PDB ID: **4NOS**).

| S.No. | Ligands                | Binding Energy (kcal/mol) | Estimated inhibition constant, $K_i$ | Residues involved in Hydrogen Bonding |
|-------|------------------------|---------------------------|--------------------------------------|---------------------------------------|
|       | <b>Reference drugs</b> |                           |                                      |                                       |
| 1.    | Aspirin                | -3.95                     | 1.27 mM                              | HIS84                                 |
| 2.    | Diclofenac             | -4.42                     | 574.89 $\mu$ M                       | THR95                                 |
|       | <b>Ligands</b>         |                           |                                      |                                       |
| 3.    | N-Acryloyl Glycine     | -4.27                     | 739.96 $\mu$ M                       | HIS84                                 |
| 4.    | G2                     | -6.00                     | 39.95 $\mu$ M                        | HIS84, ARG86                          |
| 5.    | G3                     | -4.57                     | 445.37 $\mu$ M                       | ARG83, LYS103                         |
| 6.    | G4                     | -2.50                     | 14.64 mM                             | ARG86, THR95, ARG452                  |



**Table S9.** Docking result of screened ligands for TLR-4 (PDB ID: 2Z62).

| S.No. | Ligands                | Binding Energy (kcal/mol) | Estimated inhibition constant, Ki | Residues involved in Hydrogen Bonding |
|-------|------------------------|---------------------------|-----------------------------------|---------------------------------------|
|       | <b>Reference drugs</b> |                           |                                   |                                       |
| 1.    | Aspirin                | -4.42                     | 573.96 $\mu$ M                    | LYS47, ILE48                          |
| 2.    | Diclofenac             | -4.7                      | 356.88 $\mu$ M                    | LYS47                                 |
|       | <b>Ligands</b>         |                           |                                   |                                       |
| 3.    | N-Acryloyl Glycine     | -3.88                     | 1.43 mM                           | GLN281, LYS254                        |
| 4.    | G2                     | -3.62                     | 2.21 mM                           | LYS229                                |
| 5.    | G3                     | -3.26                     | 4.09 mM                           | SER251, LYS282                        |
| 6.    | G4                     | -2.74                     | 9.82 mM                           | LYS229, LYS 282                       |

**Table S10.** Docking result of screened ligand for MAPK-14 (PDB ID: 4F9Y).

| S.No. | Ligands                | Binding Energy (kcal/mol) | Estimated inhibition constant, Ki | Residues involved in Hydrogen Bonding |
|-------|------------------------|---------------------------|-----------------------------------|---------------------------------------|
|       | <b>Reference drugs</b> |                           |                                   |                                       |
| 1.    | Aspirin                | -6.14                     | 31.39 $\mu$ M                     | LYS165                                |
| 2.    | Diclofenac             | -6.95                     | 7.99 $\mu$ M                      | HIS126                                |
|       | <b>Ligands</b>         |                           |                                   |                                       |
| 3.    | N-Acryloyl Glycine     | -4.56                     | 457.4 $\mu$ M                     | GLU160                                |
| 4.    | G2                     | -5.29                     | 132.29 $\mu$ M                    | HIS126                                |
| 5.    | G3                     | -4.44                     | 560.18 $\mu$ M                    | HIS126                                |
| 6.    | G4                     | -4.64                     | 393.84 $\mu$ M                    | HIS126                                |

**Table S11.** Docking result of screened ligand for **MAPK-8** (PDB ID: **4G1W**).

| <b>S.No.</b> | <b>Ligands</b>         | <b>Binding Energy (kcal/mol)</b> | <b>Estimated inhibition constant, Ki</b> | <b>Residues involved in Hydrogen Bonding</b> |
|--------------|------------------------|----------------------------------|------------------------------------------|----------------------------------------------|
|              | <b>Reference drugs</b> |                                  |                                          |                                              |
| 1.           | Aspirin                | -4.66                            | 382.33 $\mu$ M                           | LYS220                                       |
| 2.           | Diclofenac             | -4.12                            | 947.64 $\mu$ M                           | LYS251                                       |
|              | <b>Ligands</b>         |                                  |                                          |                                              |
| 3.           | N-Acryloyl Glycine     | -3.85                            | 1.51 mM                                  | LYS203, GLU204                               |
| 4.           | G2                     | -3.08                            | 5.57 mM                                  | TYR202, LYS203                               |
| 5.           | G3                     | -2.85                            | 8.11 mM                                  | TYR202, LYS203                               |
| 6.           | G4                     | -2.49                            | 15.0 mM                                  | TYR202, LYS203                               |

**Table S12.** Docking result of screened ligands for **STAT-1** (PDB ID: **3WWT**).

| <b>S.No.</b> | <b>Ligands</b>         | <b>Binding Energy (kcal/mol)</b> | <b>Estimated inhibition constant, Ki</b> | <b>Residues involved in Hydrogen Bonding</b> |
|--------------|------------------------|----------------------------------|------------------------------------------|----------------------------------------------|
|              | <b>Reference drugs</b> |                                  |                                          |                                              |
| 1.           | Aspirin                | -3.82                            | 1.58 mM                                  | TYR68                                        |
| 2.           | Diclofenac             | -3.6                             | 2.3 mM                                   | ARG84                                        |
|              | <b>Ligands</b>         |                                  |                                          |                                              |
| 3.           | N-Acryloyl Glycine     | -3.33                            | 3.6 mM                                   | TYR106, LYS110                               |
| 4.           | G2                     | -3.57                            | 2.4 mM                                   | LYS110, LYS114                               |
| 5.           | G3                     | -2.36                            | 18.65 mM                                 | LYS40, ARG113                                |
| 6.           | G4                     | -1.16                            | 140.03 mM                                | ARG113                                       |
